# Supplementary material for: Live and pasteurized Akkermansia muciniphila attenuate hyperuricemia in mice through modulating uric acid metabolism, inflammation, and gut microbiota
Source: Royal Society of Chemistry journal article supplement (doi:10.1039/d2fo02702j), 2022-01-01
Supplement: d2fo02702j1.pdf [file d2fo02702j1.pdf]

1 Supplemental Figures:

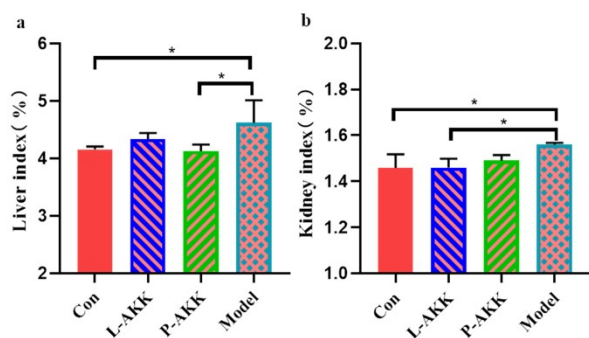

2

3 Figure S1: Changes of organ index in mice during the experiment.  $*P < 0.05$ .

4

5

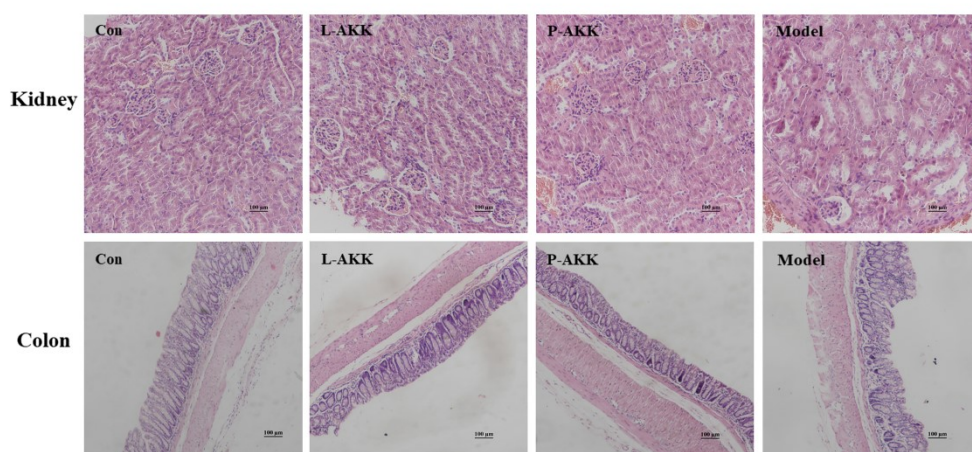

6

7 Figure S2: Histopathological images of HE stained kidney and intestinal sections.

8

9

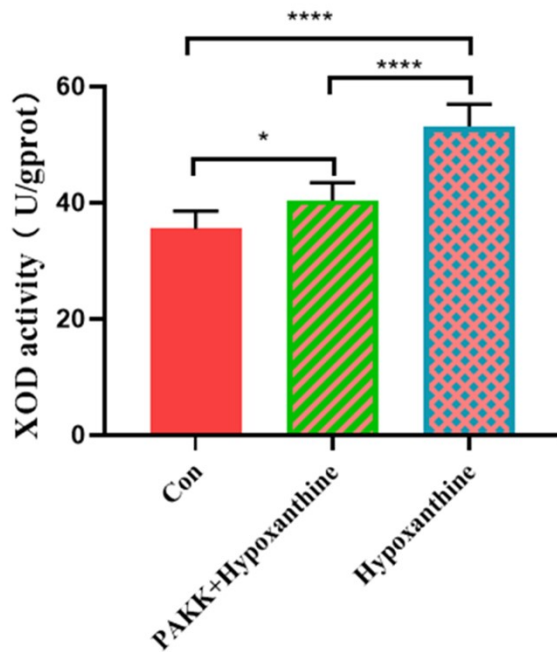

10

11 Figure S3: Pasteurized *Akkermansia muciniphila* inhibited XOD activity induced by  
12 hypoxanthine in HepG2 cells. Hypoxanthine was used to induce XOD activity in  
13 HepG2 cells. In the treatment group, HepG2 cells was co-incubated with pasteurized  
14 *A. muciniphila* before hypoxanthine induction. \* $P < 0.05$ , \*\*\*\* $P < 0.0001$ .

15
